# Supplementary material for: Synergistic Effect between Eugenol and 1,8-Cineole on Anesthesia in Guppy Fish (Poecilia reticulata)
Source: MDPI journal article supplement (doi:10.3390/vetsci11040165), 2024-04-06
Supplement: s1 [file s1]

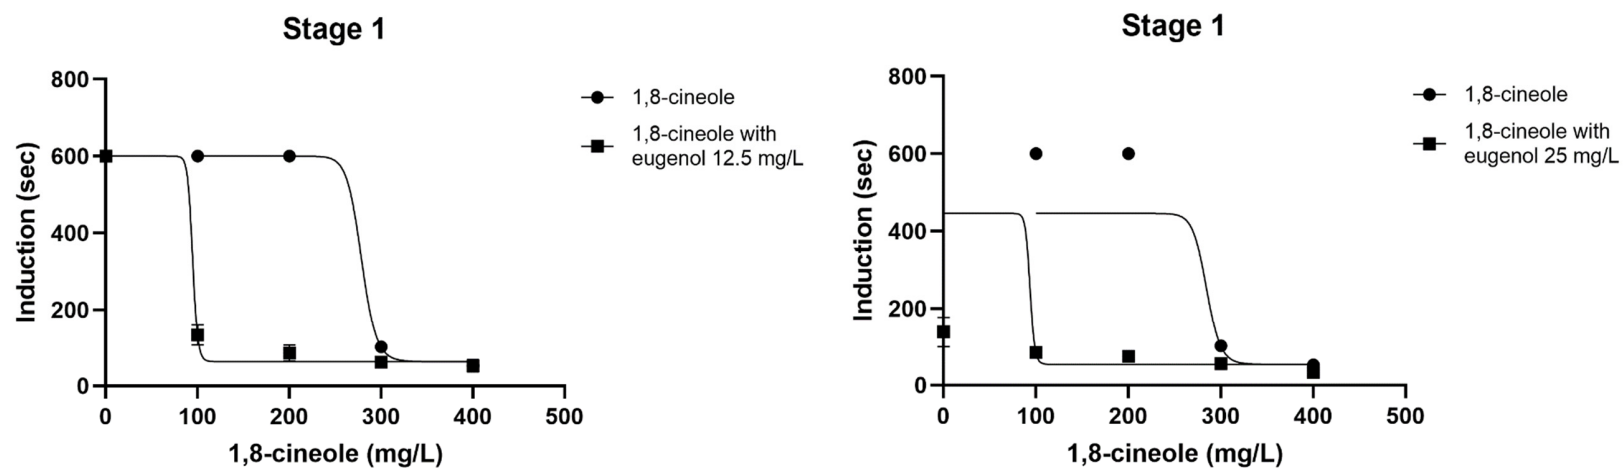

**Supplementary Figure S1.** The figure represents LogEC50, which represents the concentration of a substance required to produce a 50% response after a specified exposure time (at 12.5 mg/L and 25 mg/L of eugenol) in stage 1 of induction.

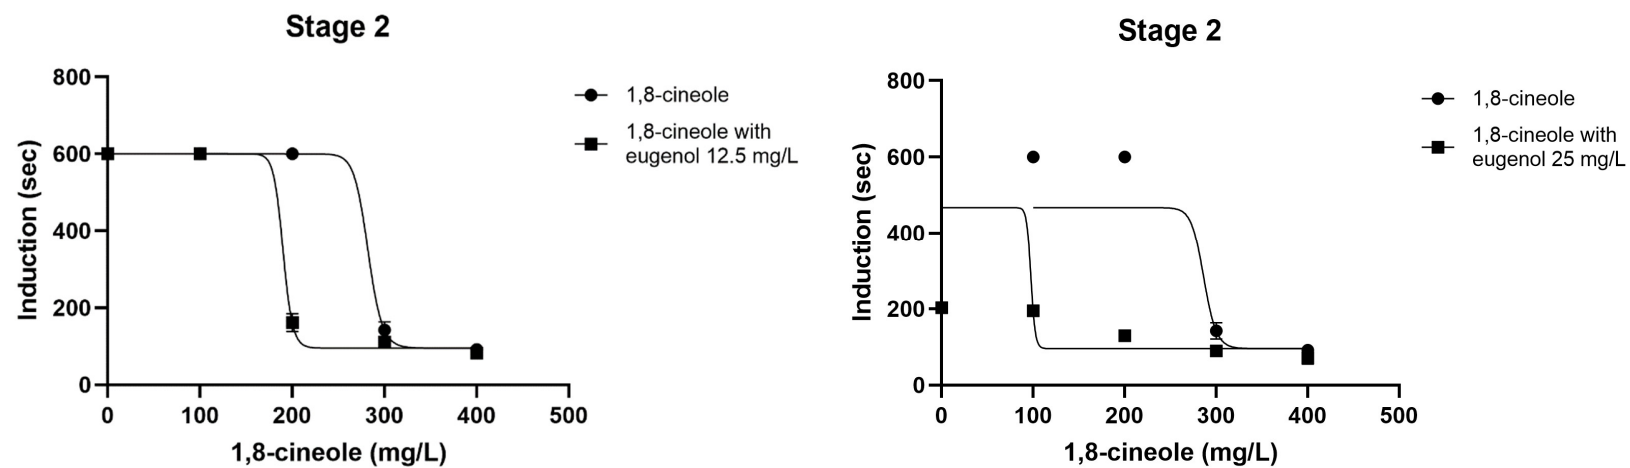

**Supplementary Figure S2.** The figure represents LogEC50, which represents the concentration of a substance required to produce a 50% response after a specified exposure time (at 12.5 mg/L and 25 mg/L of eugenol) in stage 2 of induction.
